## Volume 4 Winter Issue

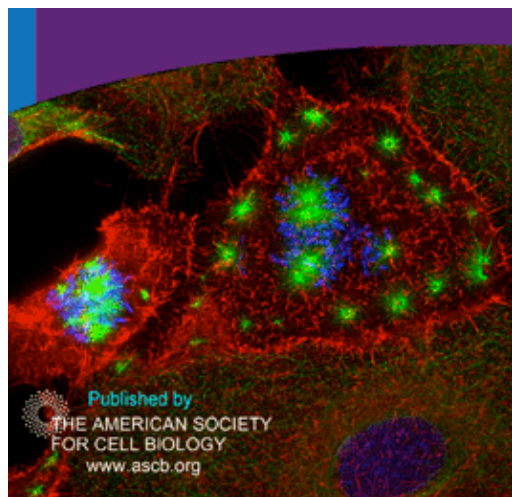

### Table of Contents

Use Arrows to Browse  
Previous Issues

### Contact CBE

8120 Woodmont Avenue Suite  
750

Bethesda, Maryland 20814-  
2762

Phone: (301) 347-9300

Fax: (301) 347-9350

cbe@ascb.org

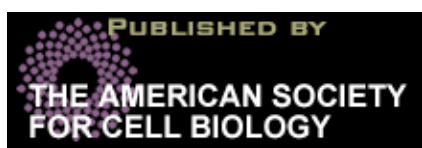

## EDITORIAL

- **The Future of CBE–Life Sciences Education**

by William B. Wood

## FEATURES

- **Approaches to Biology Teaching and Learning: Infusing Active Learning into the Large-enrollment Biology Class: Seven Strategies, from the Simple to Complex**

by Deborah Allen and Kimberly Tanner

- **From the National Academies: Ongoing Challenges to Evolution Education: Resources and Activities of the National Academies**

by Jay B. Labov

- **Video Views and Reviews: Gastrulation and the Fashioning of Animal Embryos**

by Christopher Watters

- **A 15-Year Study of 63 Teachers at 24 Institutions Reveals: “What the Best College Teachers Do”**

by Robin L. Wright, Aaron Charlson, and Carrie F. Olson, College of Biological Sciences, University of Minnesota

## ESSAYS

- **Organic First: A Biology-friendly Chemistry Curriculum**

by David Reinhold

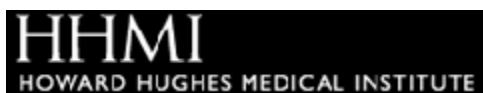

Supported in part by an Undergraduate Science Education Program grant from the Howard Hughes Medical Institute

by Dr. David Klingenberg

- **Using Long-term Time-lapse Imaging of Mammalian Cell Cycle Progression for Laboratory Instruction and Analysis**

by Edward H. Hinchcliffe

## ARTICLES

---

- **Electronic Resource Review: Genome Science: A Video Tour of the Washington University Genome Sequencing Center for High School and Undergraduate Students**  
by Susan K. Flowers, Carla Easter, Andrea Holmes, Brian Cohen, April E. Bednarski, Elaine R. Mardis, Richard K. Wilson, and Sarah C.R. Elgin
- **Teaching More by Lecturing Less**  
by Jennifer K. Knight and William B. Wood
- **The Use of a Knowledge Survey as an Indicator of Student Learning in an Introductory Biology Course**  
by Nancy Bowers, Maureen Brandon, and Cynthia D. Hill
- **Teaching Systems Biology: An Active-learning Approach**  
by Anuj Kumar
- **Teaching Research Integrity and Bioethics to Science Undergraduates**  
by Julio F. Turrens
- **Information Literacy in Biology Education: An Example from an Advanced Cell Biology Course**  
by John R. Porter

## ANNOUNCEMENTS

---

### Submit Your Manuscript

#### Online Manuscript Submission

- [Instructions to Authors](#)
- [Top Ten Reasons to Publish in CBE](#) [pdf]

### Other Information:

There are **6,450** registered users signed up to receive quarterly notification of new content.

[Become a registered user.](#)

### Order a Free CBE Poster

#### On the Cover [\[Printable Cover\]](#)

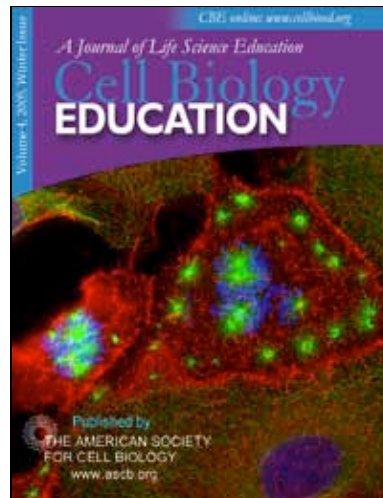

Abnormal cell division in Taxol-treated mammalian cells. Monkey kidney epithelial (BSC-1) cells were treated with Taxol, then fixed and fluorescently labeled for actin (red), microtubules (green), and DNA (blue). A z-series of digital images was collected for each fluorescent channel using a Hamamatsu ORCA-ER cooled CCD camera mounted on a Leica DM RXA2 microscope. The images were then deconvolved using a 2-D blind algorithm, and the z-series presented as a maximal projection using Simple PCI software. The final image was generated by pseudo-coloring and merging the three images. The two mitotic cells in

the field are in prophase (right) and metaphase (left). The Taxol induces multiple spindle poles to assemble within the cells, which will ultimately result in failure of cytokinesis. Image by Jessica Hornick and [Edward Hinchliffe](#), Dept. of Biological Sciences, University of Notre Dame, Notre Dame, IN 46556.
